# Supplementary material
Source: Springer Nature journal article supplement (https://www.springermedizin.de/resource/supplementary/13099_2012_69_MOESM4_ESM.pdf/9665476)

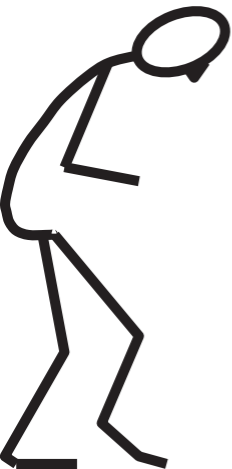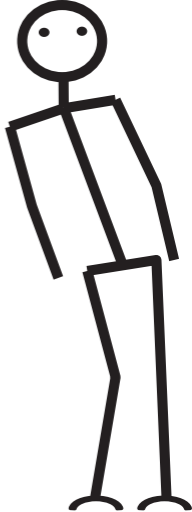

Supplement: MOESM4 [file 9665476]
